1 **Full Title:** The impact of RSV/SARS-CoV-2 co-infection on clinical disease and viral replication:  
2 insights from a BALB/c mouse model

3  
4 **Short Title:** A BALB/c mouse model for RSV and SARS-CoV-2 co-infection

5  
6 **Authors:** Dorothea R. Morris<sup>1,2,3¶\*</sup>, Yue Qu<sup>3¶</sup>, Kerrie S. Thomason<sup>3</sup>, Aline Haas de Mello<sup>3</sup>, Richard  
7 Preble<sup>4</sup>, Vineet D. Menachery<sup>1</sup>, Antonella Casola<sup>1,3</sup>, Roberto P. Garofalo<sup>1,3</sup>

8  
9 1: Department of Microbiology & Immunology, The University of Texas Medical Branch, Galveston, TX

10 2: School of Public & Population Health, The University of Texas Medical Branch, Galveston, TX

11 3: Department of Pediatrics, The University of Texas Medical Branch, Galveston, TX

12 4: John Sealy School of Medicine, The University of Texas Medical Branch, Galveston, TX

13

14 ¶: These authors contributed equally to this work

15 \*: Corresponding author, email: [dormorri@utmb.edu](mailto:dormorri@utmb.edu) (DRM), [rpgarofa@utmb.edu](mailto:rpgarofa@utmb.edu) (RPG)

16 **Abstract:** RSV and SARS-CoV-2 are prone to co-infection with other respiratory viruses. In this  
17 study, we use RSV/SARS-CoV-2 co-infection to evaluate changes to clinical disease and viral  
18 replication in vivo. To consider the severity of RSV infection, effect of sequential infection, and  
19 the impact of infection timing, mice were co-infected with varying doses and timing. Compared  
20 with a single infection of RSV or SARS-CoV-2, the co-infection of RSV/SARS-CoV-2 and the  
21 primary infection of RSV followed by SARS-CoV-2 results in protection from SARS-CoV-2-  
22 induced clinical disease and reduces SARS-CoV-2 replication. Co-infection also augmented RSV  
23 replication at early timepoints with only the low dose. Additionally, the sequential infection of  
24 RSV followed by SARS-CoV-2 led to improved RSV clearance regardless of viral load. However,  
25 SARS-CoV-2 infection followed by RSV results in enhanced SARS-CoV-2-induced disease while  
26 protecting from RSV-induced disease. SARS-CoV-2/RSV sequential infection also reduced RSV  
27 replication in the lung tissue, regardless of viral load. Collectively, these data suggest that RSV  
28 and SARS-CoV-2 co-infection may afford protection from or enhancement of disease based on  
29 variation in infection timing, viral infection order, and/or viral dose. In the pediatric population,  
30 understanding these infection dynamics will be critical to treat patients and mitigate disease  
31 outcomes.

32 **Author Summary:** Infants and young children are commonly affected by respiratory viral co-  
33 infections. While RSV and SARS-CoV-2 are two of the most prevalent respiratory viruses, their  
34 co-infection rate in children remains surprisingly low. In this study, we investigate the impact of  
35 RSV/SARS-CoV-2 co-infection on clinical disease and viral replication using an animal model. The  
36 findings indicate that RSV infection either simultaneously or prior to SARS-CoV-2 infection in  
37 mice protect against SARS-CoV-2-induced clinical disease and viral replication. On the other  
38 hand, infection with SARS-CoV-2 followed by RSV results in worsening of SARS-CoV-2-induced  
39 clinical disease, but also protection from RSV-induced clinical disease. These results highlight a  
40 protective role for RSV exposure, given this occurs before infection with SARS-CoV-2. This  
41 knowledge could help guide vaccine recommendations in children and sets a basis for future  
42 mechanistic studies.

43 **Graphical Abstract:**

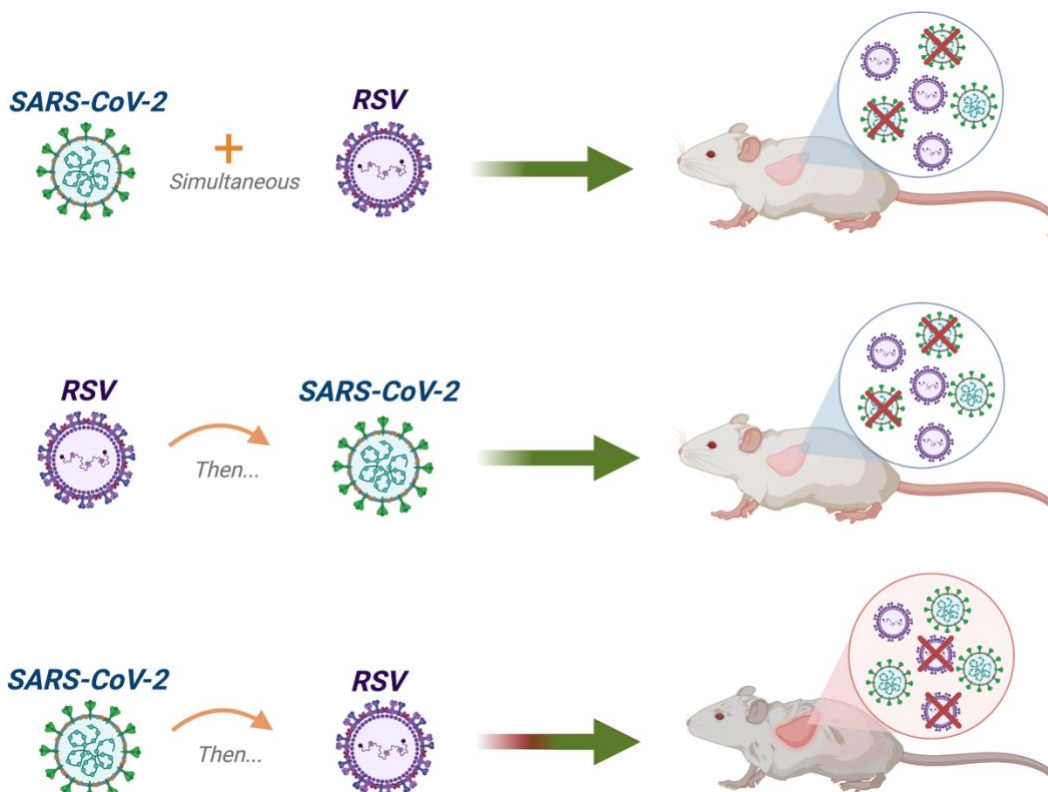

## 45 **Introduction**

46           Respiratory syncytial virus (RSV) is the leading cause of respiratory illness in infants and  
47 young children with an estimated 33 million infections each year [1]. During the COVID-19  
48 pandemic, cases of severe acute respiratory syndrome coronavirus-2 (SARS-CoV-2) in children  
49 <5 years of age had remained low until the emergence of the Delta (B.1.617.2) and Omicron  
50 (B.1.1.529) variants [2]. According to the American Academy of Pediatrics, there have been a  
51 total of 15.5 million SARS-CoV-2 infections in children since the onset of the pandemic and  
52 ~65% of these cases were recorded between September 2021 and March 2023. Additionally,  
53 the presence of SARS-CoV-2 has placed unique epidemiological pressures on all common  
54 respiratory viruses, leading to a persistent circulation of RSV in the population since May 2021  
55 [3, 4]. This has increased the likelihood of co-infections between RSV and SARS-CoV-2 among  
56 children. Interestingly, children have been found to be particularly susceptible to respiratory  
57 viral co-infection, and be more likely to be co-infected with SARS-CoV-2 than adults [5-7].  
58 Despite this, review of clinical findings for RSV/SARS-CoV-2 co-infection have reported rates on  
59 average of 3% [8-10]. These patients require moderately more supplemental care when  
60 hospitalized, but none were found to have an increased risk of mortality when compared to  
61 either virus separately. These findings are surprising as the transmission rate of RSV or SARS-  
62 CoV-2 in children is high [7, 11, 12]. Additionally, the inflammatory milieu of RSV or SARS-CoV-2  
63 would suggest co-infection between these two viruses could result in significantly worse  
64 disease outcomes, like that of influenza/SARS-CoV-2 co-infection [13-15].

65           The phenomenon of viral-viral co-infection is still poorly understood. Given the high rate  
66 of transmission and the potential severity of disease, the objective of this study was to

67 characterize baseline alteration in clinical disease and viral replication following RSV/SARS-CoV-  
68 2 co-infection using a BALB/c mouse model. We take into consideration the severity of RSV  
69 infection, the sequential effect of infection, and the impact of timing on infection. To do so,  
70 mice were inoculated with a low or high dose of RSV, were infected with RSV followed by SARS-  
71 CoV-2 or SARS-CoV-2 followed by RSV, and were either infected simultaneously or 48 hours  
72 after primary inoculation. In summary, we find that the simultaneous co-infection of RSV/SARS-  
73 CoV-2 and the infection of RSV followed by SARS-CoV-2 results in protection from SARS-CoV-2-  
74 induced clinical disease and viral replication. Reciprocally, mice infected with SARS-CoV-2  
75 followed by RSV have protection from RSV-induced disease and viral replication in the lung, but  
76 exhibit worsening of SARS-CoV-2-induced disease. Collectively, these data suggest that the  
77 timing, order, and dose of virus during co-infection can exacerbate or diminish disease. Given  
78 this, our findings shed light on an important public health concern and provide baseline data to  
79 inform treatment and future mechanistic studies.

## 80 **Results**

81  
82 ***Co-infection of RSV and SARS-CoV-2 protects against SARS-CoV-2 induced disease.*** To  
83 investigate whether simultaneous co-infection of SARS-CoV-2 with RSV affects clinical disease,  
84 groups of BALB/c mice (n=10) were intranasally inoculated with  $1 \times 10^6$  50% tissue culture  
85 infective dose (TCID<sub>50</sub>/mL) of CMA3p20 (mouse-adapted SARS-CoV-2) mixed with  $2.5 \times 10^6$   
86 plaque forming units (PFU) or  $1 \times 10^7$  PFU of RSV Long Strain in 50uL of PBS (Figure 1A). We  
87 found that the infection of SARS-CoV-2 combined with the lower infectious dose of RSV results  
88 in protection from SARS-CoV-2 induced bodyweight loss with a maximum improvement of 7.9%  
89 at day 3 p.i. (Figure 1B). These co-infected mice also had significant improvements in illness as

90 compared to the SARS-CoV-2/PBS control mice (Figure 1C). Mice infected with SARS-CoV-2  
91 combined with the higher infectious dose of RSV resulted a bodyweight loss and illness score  
92 pattern identical to that of the RSV/PBS control mice, indicating no further worsening of clinical  
93 disease due to the presence of SARS-CoV-2 (Figure 1D and 1E). These results suggest that the  
94 simultaneous infection of RSV with SARS-CoV-2 protects against SARS-CoV-2 induced disease,  
95 regardless of the RSV infection load.

96

97 ***Simultaneous co-infection of RSV and SARS-CoV-2 reduces SARS-CoV-2 replication.*** We next  
98 assessed if the simultaneous co-infection of RSV and SARS-CoV-2 would alter viral replication.  
99 Lung tissue was collected for RT-qPCR at the indicated time points corresponding to peak viral  
100 replication for either virus or a later time point to assess viral clearance (Figure 1A). Mice that  
101 were co-infected with the lower infectious dose of RSV demonstrated a significant fold increase  
102 of 4.25 in the RSV N gene copy number at day 2 p.i. as compared to the RSV/PBS control mice  
103 (Figure 2A). This increase in RSV N gene copy number was not appreciated at days 4 or 9 p.i.  
104 (Figure 2B, 2C). Interestingly, these same co-infected mice demonstrated a near complete  
105 reduction in SARS-CoV-2 N gene copy number at days 2, 4, and 9 p.i. (Figure 2A-2C). Mice that  
106 were co-infected with the higher infectious dose of RSV demonstrated no significant changes to  
107 RSV N gene copy number as compared to the RSV/PBS control mice at any time point assessed.  
108 Alternatively, these same co-infected mice demonstrated significant reductions in SARS-CoV-2  
109 N gene copy number at days 2 and 4 p.i. (Figure 2D-2F). No co-infected mice showed signs of  
110 altered viral clearance from the lung tissue as compared to the appropriate controls (Figure 2C,

111 2F). These data suggest that RSV infection protects against SARS-CoV-2 replication during  
112 simultaneous co-infection, even at low infectious doses of RSV.  
113  
114 ***Infection with SARS-CoV-2 followed by RSV results in worsening clinical disease.*** Though the  
115 simultaneous infection with two respiratory viruses is probable, it is more likely that a person  
116 would become co-infected over a short period of time. To simulate this, we designed a model in  
117 which BALB/c mice were intranasally inoculated with the secondary virus 48 h after the primary  
118 infection (Figure 3A). The groups include a mock control (PBS/PBS), RSV/PBS ( $2.5 \times 10^6$  or  $1 \times 10^7$   
119 PFU), SARS-CoV-2/PBS ( $1 \times 10^6$  TCID<sub>50</sub>/mL), RSV infection followed by SARS-CoV-2 infection  
120 (RSV/SARS-CoV-2), and SARS-CoV-2 infection followed by RSV infection (SARS-CoV-2/RSV). We  
121 first assessed impacts to clinical disease in mice infected with RSV followed by SARS-CoV-2,  
122 including bodyweight loss and illness score. RSV/SARS-CoV-2 mice that received the lower  
123 infectious dose of RSV demonstrated protection from SARS-CoV-2 induced bodyweight loss  
124 with a maximum improvement of 7.41% at day 3 p.i. (Figure 3B). These mice also had significant  
125 improvements in illness as compared to the SARS-CoV-2/PBS control mice (Figure 3C). For  
126 RSV/SARS-CoV-2 mice that received the higher infectious dose of RSV, the bodyweight loss  
127 followed the same pattern as the RSV/PBS control mice (Figure 3D). These RSV/SARS-CoV-2  
128 mice displayed a general trend towards worsening illness with significantly worse illness at days  
129 7 and 8 p.i. as compared to the RSV/PBS control mice (Figure 3E). These data demonstrate that  
130 primary infection with RSV followed by SARS-CoV-2 infection protects from SARS-CoV-2 induced  
131 clinical disease, even at the lower infectious dose of RSV.

132 We next assessed clinical disease in mice infected with SARS-CoV-2 followed by RSV.  
133 SARS-CoV-2/RSV mice that received the lower infectious dose of RSV demonstrated a trend  
134 towards worsening bodyweight loss, though this was only significant at day 7 p.i. (Figure 3B).  
135 There was no significant difference in illness score as compared to the SARS-CoV-2/PBS control  
136 mice (Figure 3C). For SARS-CoV-2/RSV mice that received the higher infectious dose of RSV, the  
137 bodyweight loss was significantly worse than the SARS-CoV-2/PBS control mice beginning at day  
138 4 p.i. and continuing through day 12 p.i. (Figure 3D). These co-infected mice were also noted to  
139 have significantly worse illness as compared to the SARS-CoV-2/PBS control mice (Figure 3E).  
140 Interestingly, these co-infected mice failed to display the strong double-weight loss curve  
141 elicited by the RSV/PBS control mice (Figure 3D). These data would indicate that primary  
142 infection with SARS-CoV-2 infection followed by RSV infection results in an exaggeration of  
143 SARS-CoV-2-induced clinical disease while protecting from RSV-induced disease.

144  
145 ***Primary infection with either RSV or SARS-CoV-2 reduces the replication of the corresponding***  
146 ***secondary virus.*** To study the effects on viral replication, lung tissue was collected at timepoints  
147 corresponding to peak viral replication or viral clearances of the secondary infection, and  
148 compared to time-matched single infection controls (Figure 3A). We first examined the  
149 RSV/SARS-CoV-2 groups. Mice infected with the lower infectious dose of RSV followed by SARS-  
150 CoV-2 had no significant alteration to RSV N gene copy number at day 4 post-RSV infection as  
151 compared to the RSV/PBS mice (Figure 4A). Interestingly, the RSV N copy number was  
152 significantly reduced in the RSV/SARS-CoV-2 mice as compared to the RSV/PBS control mice at  
153 day 9-post RSV infection, indicating more efficient clearance of RSV from the lung tissue (Figure



154 4B). These same co-infected mice exhibited significantly lower SARS-CoV-2 N gene copy  
155 numbers at day 2 post-SARS-CoV-2 infection compared to the SARS-CoV-2/PBS control mice  
156 (Figure 4A). Similarly, mice infected with the higher infectious dose of RSV followed by SARS-  
157 CoV-2 had no alteration to RSV N gene copy numbers at day 4 p.i., but exhibited significantly  
158 reduced copy numbers at day 9 p.i. as compared to the RSV/PBS mice (Figure 4C, 4D). At peak  
159 viral replication for SARS-CoV-2, these same mice had significantly reduced SARS-CoV-2 N gene  
160 copy numbers as compared to the SARS-CoV-2/PBS control mice (Figure 4C). No significant  
161 changes to viral clearance were noted for either virus (Figure 4B, 4D). These findings indicate  
162 that primary infection with RSV followed by SARS-CoV-2 leads to reduced SARS-CoV-2  
163 replication and increased RSV clearance in the lungs of BALB/c mice, regardless of the RSV  
164 infectious dose. This is similar to the simultaneous co-infection model in that SARS-CoV-2  
165 replication is reduced, but the improved clearance of RSV appears to be unique to the to the  
166 sequential infection of RSV followed by SARS-CoV-2.

167         Next, we assessed viral replication in the lung tissue of the SARS-CoV-2/RSV groups.  
168 Mice infected with SARS-CoV-2 followed by the lower infectious dose of RSV had significantly  
169 reduced RSV N gene copy numbers at days 2 and 4 post-RSV infection as compared to RSV/PBS  
170 mice (Figure 5A, 5B). In these same mice, no significant alteration to SARS-CoV-2 N gene copy  
171 number was appreciated at days 4, 6, or 9 post-SARS-CoV-2 infection as compared to the SARS-  
172 CoV-2/PBS mice (Figure 5A, 5B, 5C). Similarly, mice that received SARS-CoV-2 followed by the  
173 higher infectious dose of RSV, had significantly reduced RSV N gene copy numbers at days 2 and  
174 4 post-RSV infection as compared to RSV/PBS mice (Figure 5D, 5E). In these same co-infected  
175 mice, no significant alteration to SARS-CoV-2 N gene copy number was appreciated at days 4, 6,

176 or 9 post-SARS-CoV-2 infection as compared to the SARS-CoV-2/PBS mice (Figure 5D, 5E, 5F).  
177 These data suggest that primary infection with SARS-CoV-2 followed by RSV effectively reduces  
178 RSV replication in the lung of BALB/c mice, regardless of RSV infectious dose. This differs from  
179 the simultaneous co-infection model in that RSV replication was not altered. This change in RSV  
180 replication appears to be unique to the sequential infection of SARS-CoV-2 followed by RSV.

## 181 **Discussion**

182  
183 Despite high rates of transmission for RSV and SARS-CoV-2, the detection of RSV/SARS-  
184 COV-2 co-infections has remained low [16]. To better understand the co-infection dynamics of  
185 these two viruses, we have established baseline characteristics of clinical disease and viral  
186 replication using a BALB/c mouse model of RSV and SARS-CoV-2 co-infection. We take into  
187 consideration the severity of RSV infection, the sequential effect of infection, and the impact of  
188 timing on infection. To our knowledge, this is the first detailed description of an RSV/SARS-CoV-  
189 2 co-infection in an animal model. Here, we find that the simultaneous exposure of RSV and  
190 SARS-CoV-2 results in protection from SARS-CoV-2 induced clinical disease and viral replication,  
191 even in mice that received the lower infectious dose of RSV. Mice that received the primary  
192 infection of RSV followed by SARS-CoV-2 had similar outcomes to that of the simultaneous  
193 exposure, demonstrating protection from SARS-CoV-2 induced disease and reductions in SARS-  
194 CoV-2 replication. In contrast, mice that received the primary infection of SARS-CoV-2 followed  
195 by RSV demonstrated worsening SARS-CoV-2-induced disease with no alteration of SARS-CoV-2  
196 replication. Interestingly, these mice had simultaneous protection from RSV-induced disease  
197 and reductions in RSV replication. Collectively, these findings suggest that exposure to RSV

198 before SARS-CoV-2 may provide protection from SARS-CoV-2 induced disease, while exposure  
199 to RSV after SARS-CoV-2 could potentially worsen SARS-CoV-2 pathology.

200           These changes in clinical disease and viral replication are likely influenced by viral-viral  
201 interactions such as direct viral interference or inhibition of the secondary virus by the host  
202 response to the primary infection. In our models of simultaneous RSV/SARS-CoV-2 co-infection  
203 and secondary SARS-CoV-2 infection, replication of SARS-CoV-2 in the lung tissue is significantly  
204 reduced. This could be a consequence of RSV-induced killing of epithelial cell types key to the  
205 progression of SARS-CoV-2 from the upper to lower airways [17-20]. Additionally, priming of  
206 inflammatory cytokines and type-I interferons (IFN-I) have shown to have antiviral effects  
207 during SARS-CoV-2 infections in vitro [21]. Though RSV is thought to be a poor inducer of IFN-I  
208 when compared to other respiratory viruses, IFN-I is still induced by RSV infection along with a  
209 strong TNF- $\alpha$  and IL-6 response [22]. Therefore, inflammation induced at early timepoints and  
210 downstream activation of interferon stimulating genes (ISGs) could contribute to the limiting of  
211 SARS-CoV-2 replication in both our simultaneous and secondary co-infection models. This is  
212 supported by a recent study which shows the suppression of SARS-CoV-2 in a model of  
213 simultaneous RSV/SARS-CoV-2 co-infection in human bronchial epithelial cells (HBECS) to be  
214 mediated by ISG15 and IRF-3 signaling [23].

215           Interestingly, primary infection with SARS-CoV-2 followed by RSV resulted in reduced  
216 RSV replication in the lung. Similar mechanisms of epithelial damage could potentially explain  
217 this reduction, limiting RSV replication to the upper airways [18]. Since IFN-I expression has  
218 been previously shown to not directly alter RSV replication, it is more likely that the immune  
219 cell repertoire elicited at day 2 p.i. to SARS-CoV-2 infection may be ideal for limiting RSV

220 replication [24]. Additionally, these SARS-CoV-2/RSV infected mice had worsening SARS-CoV-2  
221 induced clinical disease. This could be explained by an increase in cytokine activity or ISG  
222 induction by RSV that could further impact the inflammatory response, resulting in worsening  
223 of SARS-CoV-2 pathology [25]. Our findings of inhibition of the secondarily infected virus are  
224 consistent with what has been shown for SARS-CoV-2/Influenza co-infections in mice [15].  
225 Interestingly, our model of RSV/SARS-CoV-2 differs from SARS-CoV-2/Influenza co-infection in  
226 that the latter leads to prolonged replication of either primarily infected virus. Our data would  
227 suggest that the primary infecting virus is either unaffected or cleared from the lung more  
228 efficiently (Figure 4). Having established the baseline dynamics of clinical disease and viral  
229 replication through our co-infection model, future characterization of the immune response  
230 and viral spread during RSV/SARS-CoV-2 co-infection should be investigated.

231         At the beginning of the COVID-19 pandemic, cases of SARS-CoV-2 among children were  
232 surprisingly rare [2]. It wasn't until the historic low in circulation of other respiratory viral  
233 infections during the 2020/2021 winter season, and the emergence of the Delta variant in mid-  
234 2021 that we began to see more consistent SARS-CoV-2 infections in the pediatric population  
235 [2-4]. Interestingly, the 2019/2020 RSV season was described as having a high number of RSV  
236 infections and lasting longer than usual in some countries [26-28]. Based on the data presented  
237 in this study, it is plausible that RSV infections among children during the 2019/2020 season  
238 could have contributed to this resistance to infection during the initial 2019/2020 SARS-CoV-2  
239 wave. With the anticipated release of the RSV vaccine in the coming months, it is also  
240 important to consider how this may affect the RSV/SARS-CoV-2 interaction. Pfizer has reported  
241 that their RSV vaccine is 81.8% effective at reducing the occurrence of severe RSV infections in

242 infants [29]. Our data would suggest that having even a mild RSV infection would potentially  
243 protect from SARS-CoV-2 induced disease.

244           Taken together, this study has established a working animal model for and provides  
245 important insights into RSV/SARS-CoV-2 co-infections. Our findings suggest that exposure to  
246 RSV before SARS-CoV-2 may provide protection from SARS-CoV-2 induced disease, while  
247 exposure to RSV after SARS-CoV-2 could potentially worsen SARS-CoV-2 pathology. Moreover,  
248 this study highlights the potential impact of RSV infections on the susceptibility and resistance  
249 to SARS-CoV-2, especially in the pediatric population. Further research is needed to better  
250 understand the underlying mechanisms driving these changes in clinical disease and viral  
251 replication. Given these baseline characteristics, our model could be used to strengthen  
252 treatment strategies for co-infected patients and to further our knowledge of the unique  
253 interplay between RSV and SARS-CoV-2.

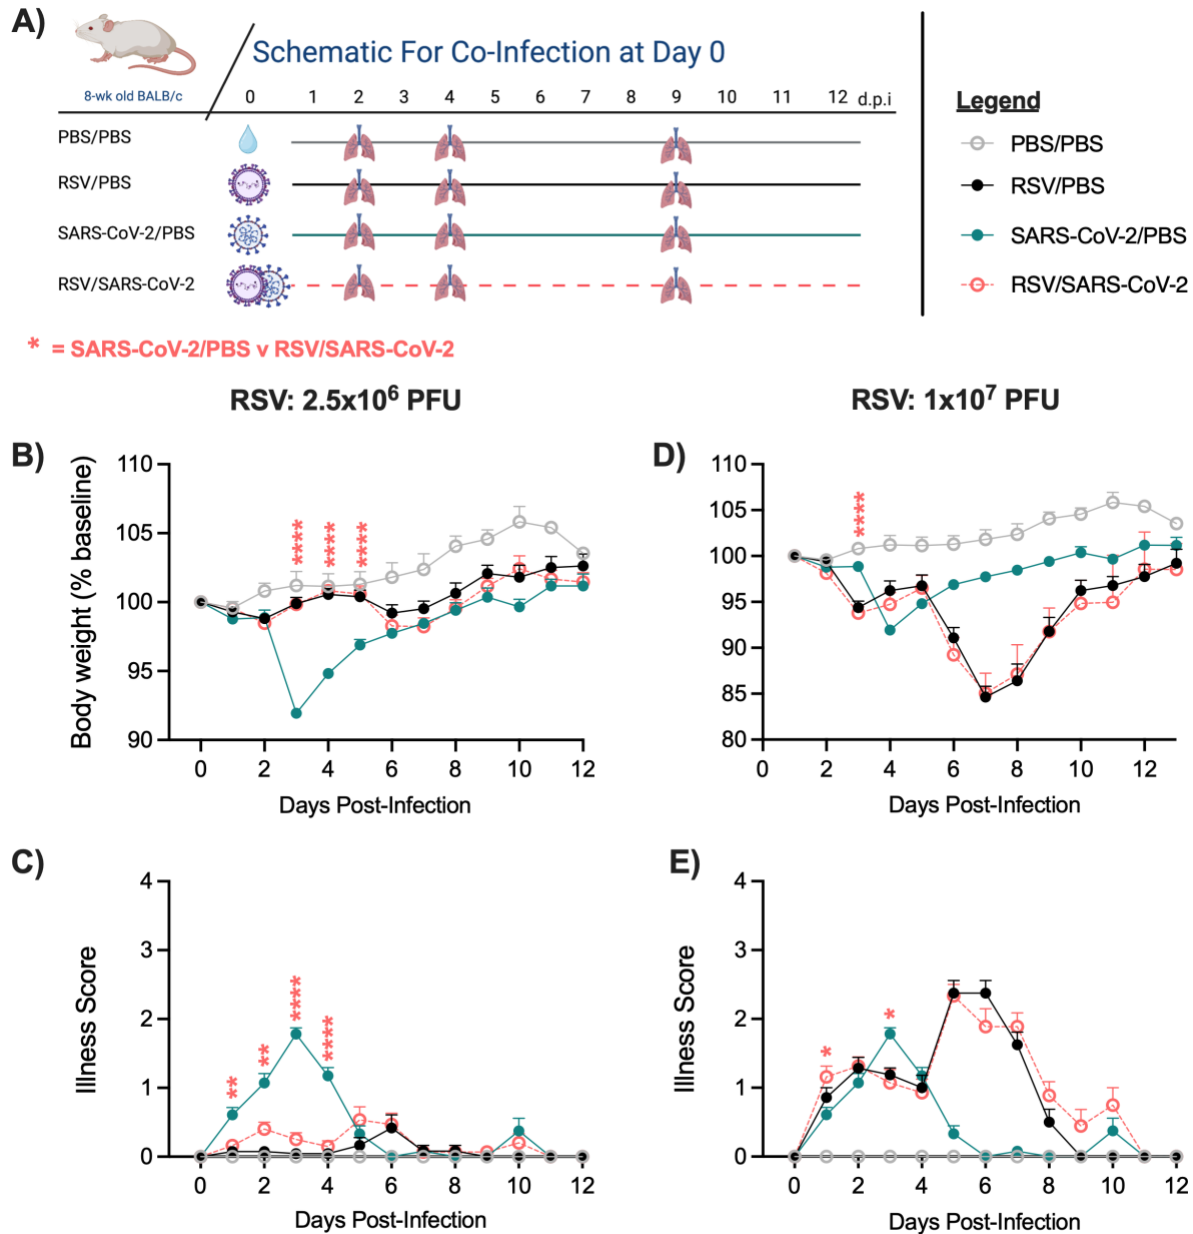

254

255

256 **Fig 1.** Assessment of clinical disease in BALB/c mice simultaneously co-infected with RSV and  
 257 SARS-CoV-2. (A) The experimental design for Figure 1 and Figure 2. BALB/c mice were IN  
 258 inoculated with PBS, RSV/PBS at a dose of either  $2.5 \times 10^6$  or  $1 \times 10^7$  PFU, SARS-CoV-2/PBS at a  
 259 dose of  $1 \times 10^6$  TCID<sub>50</sub>/mL, or RSV/SARS-CoV-2 simultaneously. (B-E) Mice were monitored for  
 260 changes in bodyweight loss and illness score over the 12-day infection period. Data are pooled  
 261 from three independent experiments for mice infected with the RSV dose of  $2.5 \times 10^6$  PFU ( $n \leq$   
 262 25 mice/group). Data are pooled from two independent experiments for mice infected with the  
 263 RSV dose of  $1 \times 10^7$  PFU ( $n=20$  mice/group). Data are expressed as mean  $\pm$  SEM. Significant  
 264 results as compared to the SARS-CoV-2/PBS control are marked with asterisks (\*  $p \leq 0.05$ , \*\*  $p$   
 265  $\leq 0.01$ , \*\*\*\*  $p \leq 0.0001$ ).

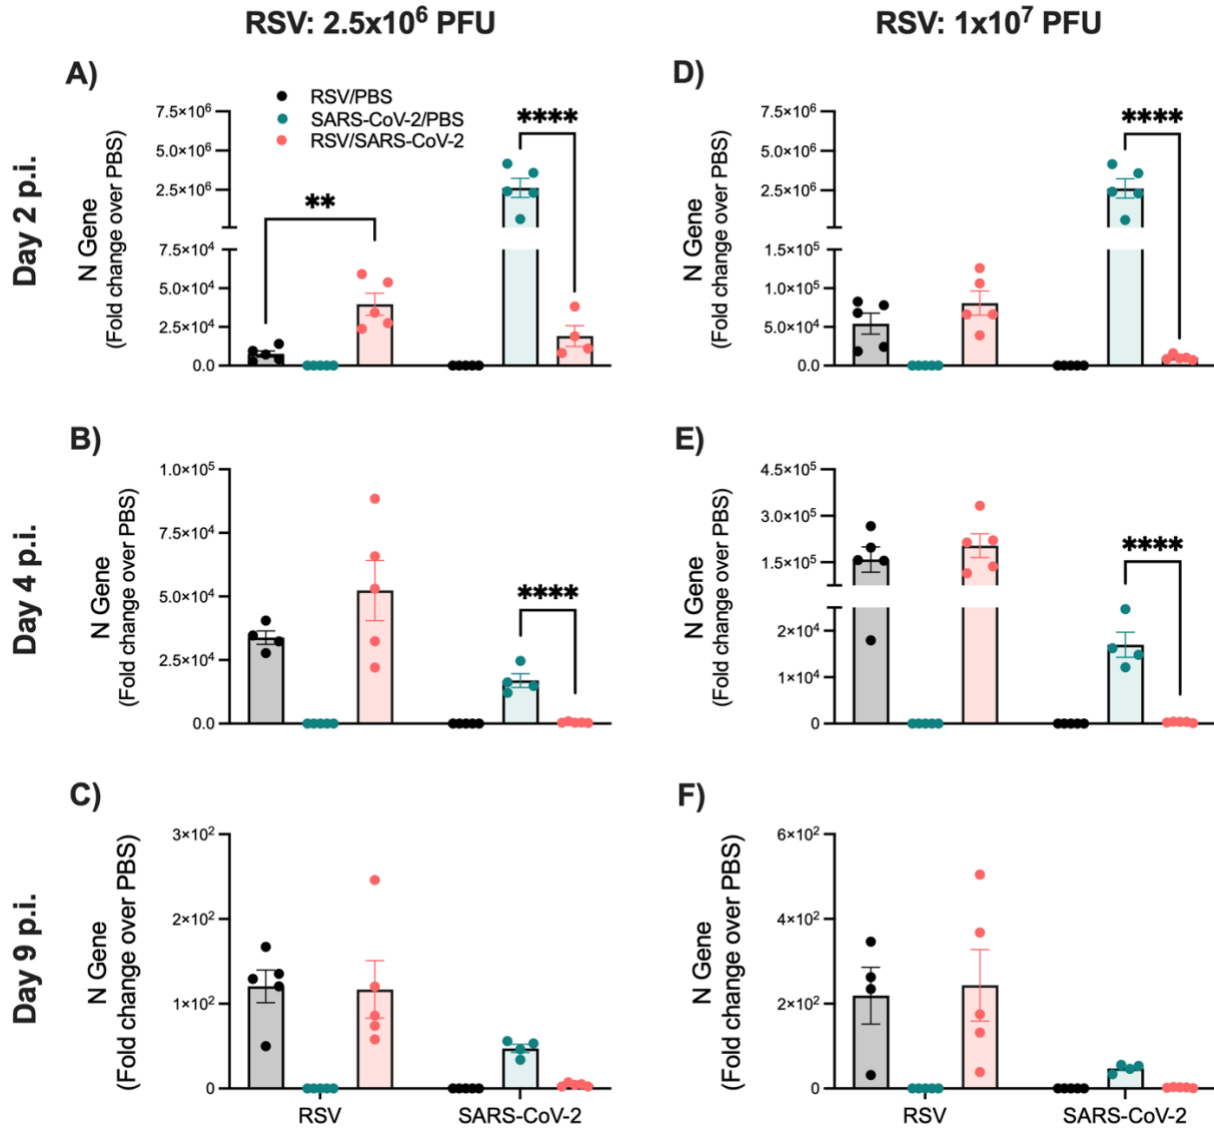

266  
267

268 **Fig. 2:** Assessment of gene expression by RT-qPCR in the lung of BALB/c mice simultaneously co-  
269 infected with RSV and SARS-CoV-2. Mice were infected as shown in Figure 1A. Lung tissue was  
270 collected at (A,D) day 2, (B,E) day 4, and (C,F) day 9 p.i. to assess RSV N and SARS-CoV-2 N gene  
271 expression by RT-qPCR. Data are expressed as mean  $\pm$  SEM. Significant results as compared to  
272 the respective controls are marked with asterisks ( \*\*  $p \leq 0.01$ , \*\*\*\*  $p \leq 0.0001$ ).

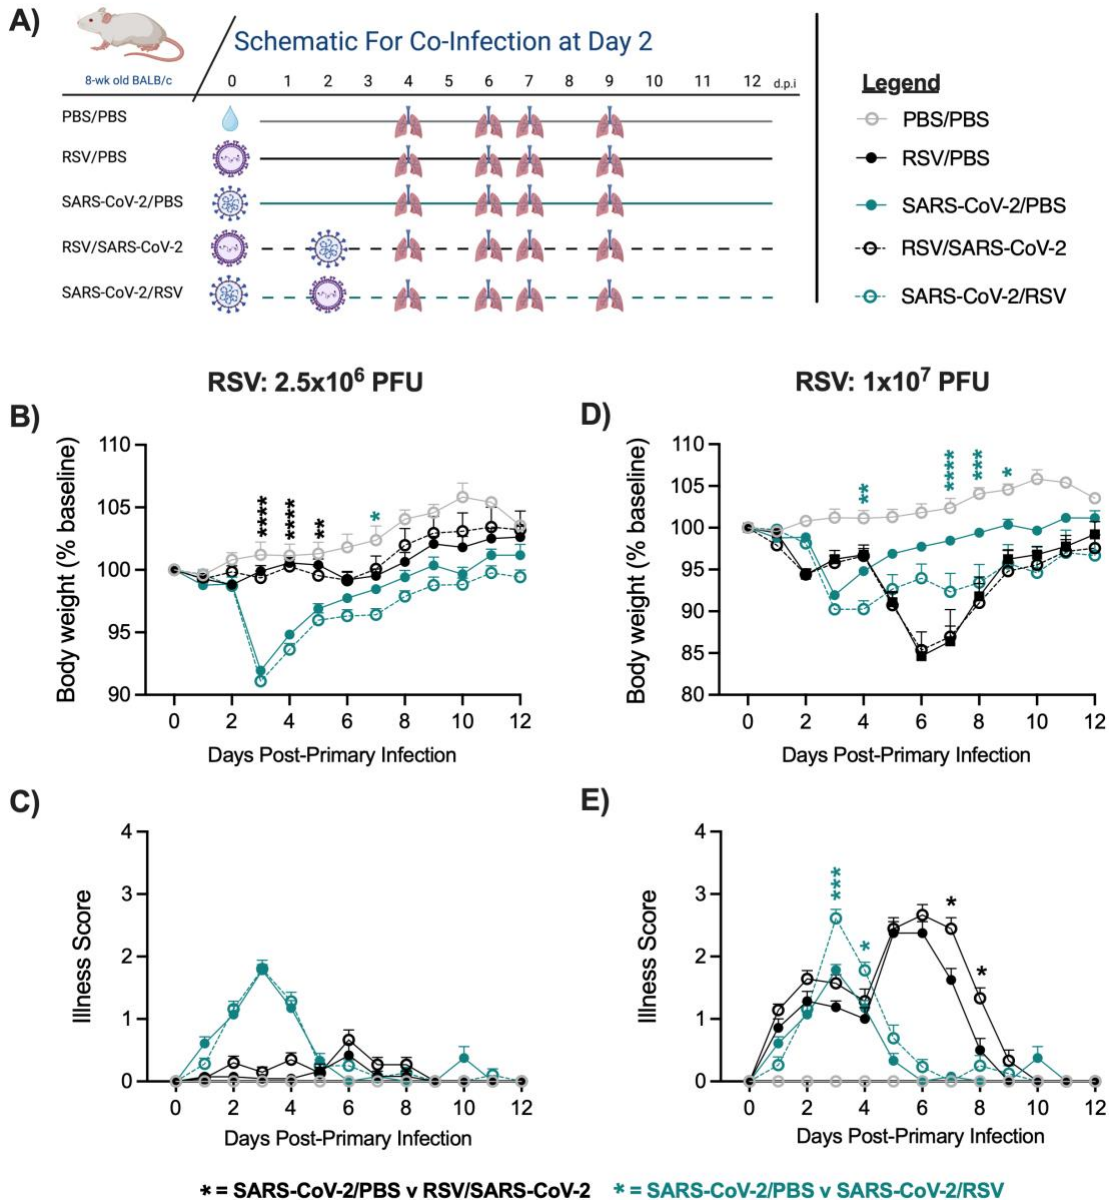

273  
274

275 **Fig 3.** Assessment of clinical disease in BALB/c mice co-infected 48 h after primary infection. (A)  
276 The experimental design for Figures 3-5. BALB/c mice were IN inoculated with PBS, RSV/PBS at  
277 a dose of either  $2.5 \times 10^6$  or  $1 \times 10^7$  PFU, SARS-CoV-2/PBS at a dose of  $1 \times 10^6$  TCID<sub>50</sub>/mL, RSV  
278 followed by SARS-CoV-2, or SARS-CoV-2 followed by RSV. (B-E) Mice were monitored for  
279 changes in bodyweight loss and illness score over the 12-day infection period. Data are pooled  
280 from three independent experiments for mice infected with the RSV dose of  $2.5 \times 10^6$  PFU ( $n \leq$   
281 25 mice/group). Data are pooled from two independent experiments for mice infected with the  
282 RSV dose of  $1 \times 10^7$  PFU ( $n \leq 15$  mice/group). Data are expressed as mean  $\pm$  SEM. Significant  
283 results as compared to the RSV/PBS control are marked with black asterisks. Significant results  
284 as compared to the SARS-CoV-2/PBS control are marked with green asterisks (\*  $p \leq 0.05$ , \*\*  $p \leq$   
285 0.01, \*\*\*  $p \leq 0.001$ , \*\*\*\*  $p \leq 0.0001$ ).



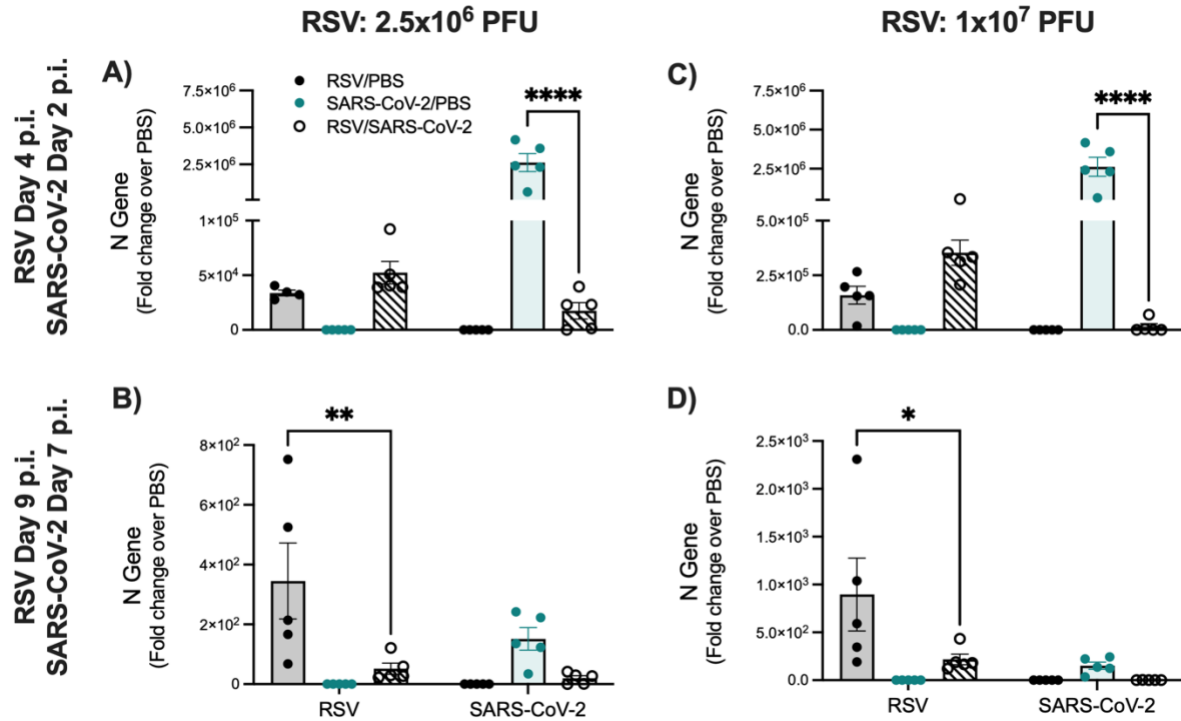

286  
287  
288  
289  
290  
291  
292

**Fig. 4:** Assessment of gene expression by RT-qPCR in the lung of BALB/c mice infected with RSV followed by SARS-CoV-2. Mice were infected as shown in Figure 3A. Lung tissue was collected at (A,C) day 4 post-RSV infection/day 2 post-SARS-CoV-2 infection, and (B,D) day 9 post-RSV infection/day 7 post-SARS-CoV-2 infection to assess RSV N and SARS-CoV-2 N gene expression by RT-qPCR. Data are expressed as mean  $\pm$  SEM. Significant results as compared to the respective controls are marked with asterisks ( \*  $p \leq 0.05$ , \*\*  $p \leq 0.01$ , \*\*\*\*  $p \leq 0.0001$ ).

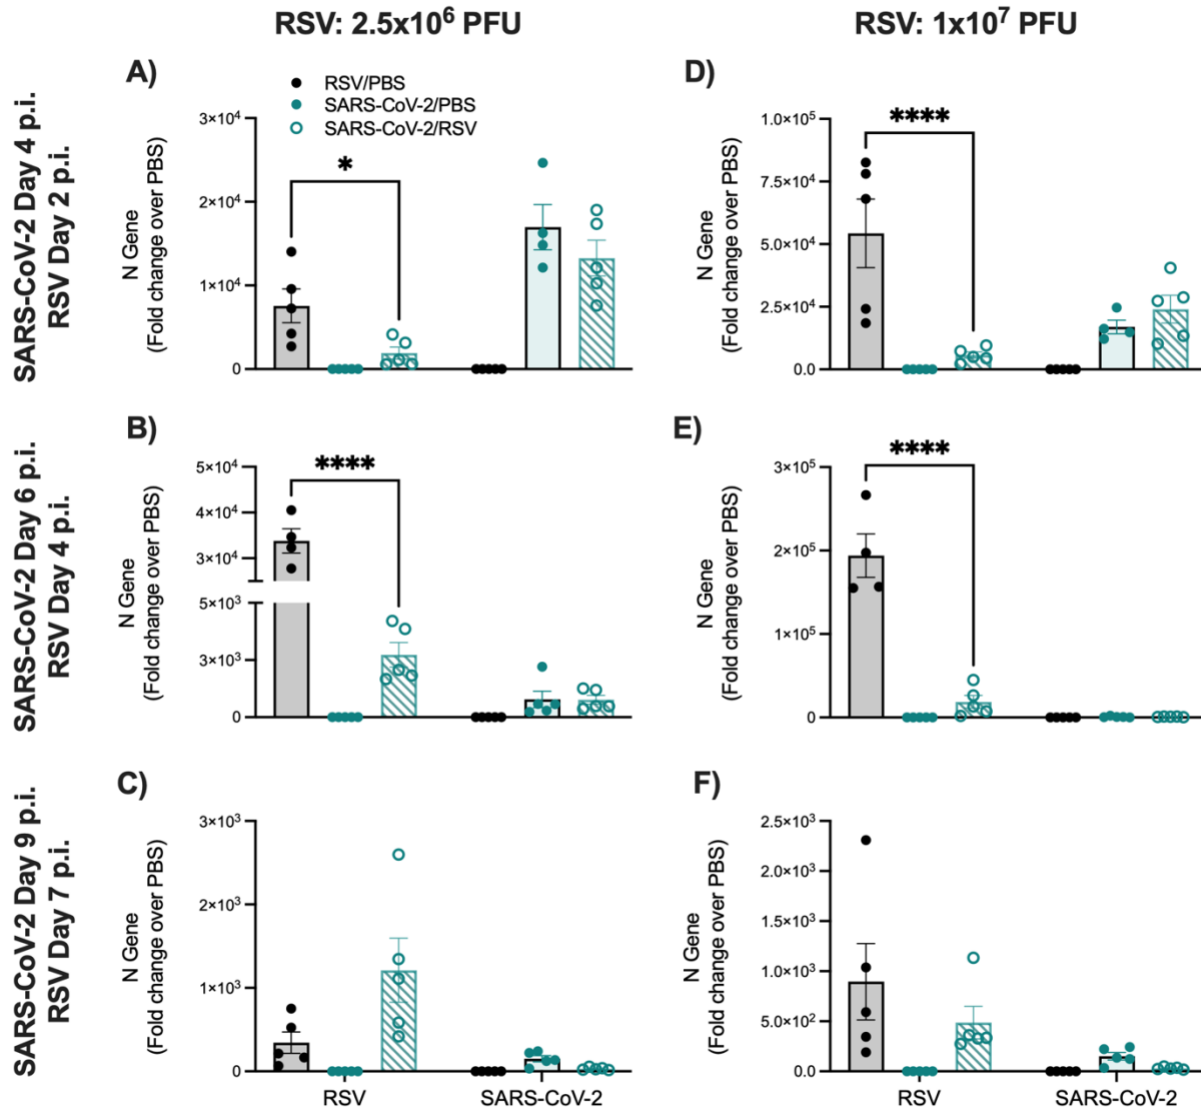

293  
294

295 **Fig. 5:** Assessment of gene expression by RT-qPCR in the lung of BALB/c mice infected with SARS-  
296 CoV-2 followed by RSV. Mice were infected as shown in Figure 3A. Lung tissue was collected at  
297 (A,D) day 4 post-SARS-CoV-2 infection/day 2 post-RSV infection, (B,E) day 6 post-SARS-CoV-2  
298 infection/day 4 post-RSV infection, and (C,F) day 9 post-SARS-CoV-2 infection/day 7 post-RSV  
299 infection to assess RSV N and SARS-CoV-2 N gene expression by RT-qPCR. Data are expressed as  
300 mean  $\pm$  SEM. Significant results as compared to the respective controls are marked with  
301 asterisks (\*  $p \leq 0.05$ , \*\*\*\*  $p \leq 0.0001$ ).

## 302 **Materials and Methods**

303

304 **Ethics statement:** All care and procedures involving mice in this study were completed in  
305 accordance with the recommendations in the *Guide for the Care and Use of Laboratory Animals*  
306 of the National Institutes of Health and the UTMB institutional guidelines for animal care. The  
307 Institutional Animal Care and Use Committee (IACUC) of UTMB approved these animal studies  
308 under protocol 2102014.

309

310 **Virus preparations:** The mouse-adapted SARS-CoV-2 strain, CMA3p20, was a gift from Dr.  
311 Vineet D. Menachery. Information pertaining to the development of CMA3p20 can be found  
312 here [30]. Propagation of CMA3p20 was done as described previously [31]. All mention of SARS-  
313 CoV-2 in this study pertains to the use of CMA3p20. All virus preparations for SARS-CoV-2 were  
314 performed by trained personnel in a biosafety level 3 (BSL-3) facility.

315

316 **Animal infections:** Female, 8 to 10-week-old BALB/c mice were purchased from Envigo  
317 (Indianapolis, IN, USA) and maintained in Sealsafe HEPA-filtered air in/out units. For infection,  
318 mice were anesthetized with isoflurane and infected intranasally (IN) with SARS-CoV-2 and/or  
319 RSV diluted in 50 $\mu$ L of PBS. For SARS-CoV-2 infections, mice were IN inoculated with a dose of  
320  $1 \times 10^6$  TCID<sub>50</sub>/mL. For RSV infections, mice were IN inoculated with  $2.5 \times 10^6$  PFU or  $1 \times 10^7$  PFU of  
321 RSV Long Strain. For simultaneous co-infection experiments, SARS-CoV-2 was combined with  
322 RSV in PBS prior to inoculation. For co-infection 48 h apart, mice were IN inoculated with either  
323 SARS-CoV-2 or RSV day 0. On day 2, mice were anesthetized and then IN inoculated with the  
324 corresponding virus. All animals were monitored for weight loss and illness was scored as  
325 described [32]. At days 2, 4, 6, 7, and 9 p.i., lung tissue was collected for assessment of viral  
326 replication by RT-qPCR. Due to the lack of weight loss in the  $2.5 \times 10^6$  PFU RSV mice, lung tissue  
327 was collected at day 4 p.i. and active infection was confirmed by plaque assay as described  
328 (data not shown; [33]). All animal experiments involving infectious virus were performed in  
329 UTMB's animal biosafety level 3 (ABSL-3) facility by trained personnel with routine medical  
330 monitoring of staff.

331

332 **Assessment of Viral N Gene by RT-qPCR:** The right lung was collected at the timepoints  
333 indicated above. Tissue was homogenized in TRizol and 500 $\mu$ L of tissue lysate was subjected to  
334 phase separation using chloroform. The top aqueous layer was then further processed using  
335 the Qiagen RNeasy Mini kit in accordance with the manufacturer's instructions. Isolated RNA  
336 was directly subjected to one-step RT-qPCR analysis using TaqMan Fast Virus 1-Step Master Mix  
337 (Thermo Fisher Scientific, MA, USA) and Bio-Rad CFX instrumentation (Bio-Rad, CA, USA). The  
338 following custom TaqMan gene expression assay IDs were used to assess the expression of RSV  
339 N and SARS-CoV-2 N genes: ARU66XH and APNKYWD (Applied Biosystems, CA, USA). A no  
340 template control was included in each run. One-step RT-qPCR reactions were run as follows:  
341 50C for 5 min, 95C for 20s, followed by 40 cycles of 95C for 15s, then 60C for 60s. Cycle  
342 threshold ( $C_T$ ) values were analyzed in Microsoft Excel by the comparative  $C_T$  ( $\Delta\Delta C_T$ ) method  
343 according to the manufacturer's instructions (Applied Biosystems). The amount of target  
344 ( $2^{-\Delta\Delta C_T}$ ) was obtained by normalization to the endogenous reference (18S) sample. Fold change  
345 in gene expression was calculated in comparison to the PBS control mice.

346 **Statistics:** Statistical analyses were performed using an ordinary two-way ANOVA followed by  
347 Tukey's multiple comparison test, a mixed-effects model followed by Geisser-Greenhouse  
348 correction, or an unpaired student's t-test (GraphPad Prism 9.5.1; GraphPad Software, Inc., San  
349 Diego, CA, USA). Results are expressed as mean  $\pm$  SEM for each experimental group and  $p \leq$   
350 0.05 value was selected to indicate significance.

351  
352 **Acknowledgements:** We would like to thank Slobodan Paessler for his assistance with the BSL3  
353 facilities and Michelle N. Vu for her helpful discussions. The graphical figures were created  
354 using BioRender.com.

355  
356 **Contributions:** DRM conceptualized this study, obtained funding for this study, conducted the  
357 animal experiments, and wrote the manuscript. YQ conducted the animal experiments and  
358 edited the manuscript drafts. KST and AHM conducted the RT-qPCR experiments and edited the  
359 manuscript draft. RP created the graphical abstract. VDM provided the mouse-adapted SARS-  
360 CoV-2 virus. AC and RPG obtained funding for this study and provided experimental support.

361  
362 **Funding:** This research was funded by UTMB Institution for Human Infections and Immunity  
363 (IHII) Data Acquisition Grants as well as the NIH grant AI062885.

364  
365 **References:**

- 366  
367 1. Li Y, Wang X, Blau DM, Caballero MT, Feikin DR, Gill CJ, et al. Global, regional, and  
368 national disease burden estimates of acute lower respiratory infections due to respiratory  
369 syncytial virus in children younger than 5 years in 2019: a systematic analysis. *Lancet*.  
370 2022;399(10340):2047-64. Epub 2022/05/23. doi: 10.1016/S0140-6736(22)00478-0. PubMed  
371 PMID: 35598608; PubMed Central PMCID: PMCPMC7613574.
- 372 2. Brodin P. SARS-CoV-2 infections in children: Understanding diverse outcomes.  
373 *Immunity*. 2022;55(2):201-9. Epub 2022/01/31. doi: 10.1016/j.immuni.2022.01.014. PubMed  
374 PMID: 35093190; PubMed Central PMCID: PMCPMC8769938.
- 375 3. ECDC. Intensified circulation of respiratory syncytial virus (RSV) and associated hospital  
376 burden in the EU/EEA 2022 12 December 2022. Available from:  
377 [https://www.ecdc.europa.eu/en/publications-data/intensified-circulation-respiratory-syncytial-](https://www.ecdc.europa.eu/en/publications-data/intensified-circulation-respiratory-syncytial-virus-rsv-and-associated-hospital)  
378 [virus-rsv-and-associated-hospital](https://www.ecdc.europa.eu/en/publications-data/intensified-circulation-respiratory-syncytial-virus-rsv-and-associated-hospital).
- 379 4. Hamid S, Winn A, Parikh R, Jones JM, McMorrow M, Prill MM, et al. Seasonality of  
380 Respiratory Syncytial Virus - United States, 2017-2023. *MMWR Morb Mortal Wkly Rep*.  
381 2023;72(14):355-61. Epub 2023/04/07. doi: 10.15585/mmwr.mm7214a1. PubMed PMID:  
382 37022977; PubMed Central PMCID: PMCPMC10078848 Journal Editors form for disclosure of  
383 potential conflicts of interest. No potential conflicts of interest were disclosed.
- 384 5. Mandelia Y, Procop GW, Richter SS, Worley S, Liu W, Esper F. Dynamics and  
385 predisposition of respiratory viral co-infections in children and adults. *Clin Microbiol Infect*.  
386 2021;27(4):631.e1-e6. Epub 2020/06/17. doi: 10.1016/j.cmi.2020.05.042. PubMed PMID:  
387 32540470.
- 388 6. Pigny F, Wagner N, Rohr M, Mamin A, Cherpillod P, Posfay-Barbe KM, et al. Viral co-  
389 infections among SARS-CoV-2-infected children and infected adult household contacts. *Eur J*

- 390 *Pediatr.* 2021;180(6):1991-5. Epub 2021/01/28. doi: 10.1007/s00431-021-03947-x. PubMed  
391 PMID: 33502627; PubMed Central PMCID: PMCPMC7838463.
- 392 7. Dawood FS, Porucznik CA, Veguilla V, Stanford JB, Duque J, Rolfes MA, et al. Incidence  
393 Rates, Household Infection Risk, and Clinical Characteristics of SARS-CoV-2 Infection Among  
394 Children and Adults in Utah and New York City, New York. *JAMA Pediatrics.* 2022;176(1):59-67.  
395 doi: 10.1001/jamapediatrics.2021.4217.
- 396 8. Halabi KC, Wang H, Leber AL, Sánchez PJ, Ramilo O, Mejias A. Respiratory syncytial virus  
397 and SARS-CoV-2 coinfections in children. *Pediatr Pulmonol.* 2022;57(12):3158-60. Epub  
398 2022/08/24. doi: 10.1002/ppul.26127. PubMed PMID: 35997032; PubMed Central PMCID:  
399 PMCPMC9538042.
- 400 9. Agathis NT, Patel K, Milucky J, Taylor CA, Whitaker M, Pham H, et al. Codetections of  
401 Other Respiratory Viruses Among Children Hospitalized With COVID-19. *Pediatrics.* 2023;151(2).  
402 doi: 10.1542/peds.2022-059037.
- 403 10. Kahanowitch R, Gaviria S, Aguilar H, Gayoso G, Chorvinsky E, Bera B, et al. How did  
404 respiratory syncytial virus and other pediatric respiratory viruses change during the COVID-19  
405 pandemic? *Pediatr Pulmonol.* 2022;57(10):2542-5. Epub 2022/07/02. doi: 10.1002/ppul.26053.  
406 PubMed PMID: 35774020; PubMed Central PMCID: PMCPMC9349531.
- 407 11. Paul LA, Daneman N, Schwartz KL, Science M, Brown KA, Whelan M, et al. Association of  
408 Age and Pediatric Household Transmission of SARS-CoV-2 Infection. *JAMA Pediatrics.*  
409 2021;175(11):1151-8. doi: 10.1001/jamapediatrics.2021.2770.
- 410 12. Lam-Hine T, McCurdy SA, Santora L, Duncan L, Corbett-Detig R, Kapusinszky B, et al.  
411 Outbreak Associated with SARS-CoV-2 B.1.617.2 (Delta) Variant in an Elementary School - Marin  
412 County, California, May-June 2021. *MMWR Morb Mortal Wkly Rep.* 2021;70(35):1214-9. Epub  
413 2021/09/03. doi: 10.15585/mmwr.mm7035e2. PubMed PMID: 34473683; PubMed Central  
414 PMCID: PMCPMC8422870 Journal Editors form for disclosure of potential conflicts of interest.  
415 Lael Duncan reports Pfizer and Moderna stock ownership. No other potential conflicts of  
416 interest were disclosed.
- 417 13. Stowe J, Tessier E, Zhao H, Guy R, Muller-Pebody B, Zambon M, et al. Interactions  
418 between SARS-CoV-2 and influenza, and the impact of coinfection on disease severity: a test-  
419 negative design. *International Journal of Epidemiology.* 2021;50(4):1124-33. doi:  
420 10.1093/ije/dyab081.
- 421 14. Dao TL, Hoang VT, Colson P, Million M, Gautret P. Co-infection of SARS-CoV-2 and  
422 influenza viruses: A systematic review and meta-analysis. *Journal of Clinical Virology Plus.*  
423 2021;1(3):100036. doi: <https://doi.org/10.1016/j.jcvp.2021.100036>.
- 424 15. Kim E-H, Nguyen T-Q, Casel MAB, Rollon R, Kim S-M, Kim Y-I, et al. Coinfection with  
425 SARS-CoV-2 and Influenza A Virus Increases Disease Severity and Impairs Neutralizing Antibody  
426 and CD4<sup>+</sup> T Cell Responses. *Journal of virology.* 2022;96(6):e01873-21. doi:  
427 doi:10.1128/jvi.01873-21.
- 428 16. Quintero AM, Eisner M, Sayegh R, Wright T, Ramilo O, Leber AL, et al. Differences in  
429 SARS-CoV-2 Clinical Manifestations and Disease Severity in Children and Adolescents by  
430 Infecting Variant. *Emerg Infect Dis.* 2022;28(11):2270-80. Epub 2022/10/27. doi:  
431 10.3201/eid2811.220577. PubMed PMID: 36285986; PubMed Central PMCID:  
432 PMCPMC9622241.

- 433 17. Wu CT, Lidsky PV, Xiao Y, Cheng R, Lee IT, Nakayama T, et al. SARS-CoV-2 replication in  
434 airway epithelia requires motile cilia and microvillar reprogramming. *Cell*. 2023;186(1):112-30  
435 e20. Epub 2022/12/30. doi: 10.1016/j.cell.2022.11.030. PubMed PMID: 36580912; PubMed  
436 Central PMCID: PMC9715480.
- 437 18. Koch CM, Prigge AD, Setar L, Anekalla KR, Do-Umehara HC, Abdala-Valencia H, et al.  
438 Cilia-related gene signature in the nasal mucosa correlates with disease severity and outcomes  
439 in critical respiratory syncytial virus bronchiolitis. *Frontiers in immunology*. 2022;13:924792.  
440 Epub 2022/10/11. doi: 10.3389/fimmu.2022.924792. PubMed PMID: 36211387; PubMed  
441 Central PMCID: PMC9540395.
- 442 19. Smith CM, Kulkarni H, Radhakrishnan P, Rutman A, Bankart MJ, Williams G, et al. Ciliary  
443 dyskinesia is an early feature of respiratory syncytial virus infection. *European Respiratory  
444 Journal*. 2014;43(2):485-96. doi: 10.1183/09031936.00205312.
- 445 20. Mata M, Sarrion I, Armengot M, Carda C, Martinez I, Melero JA, et al. Respiratory  
446 syncytial virus inhibits ciliogenesis in differentiated normal human bronchial epithelial cells:  
447 effectiveness of N-acetylcysteine. *PloS one*. 2012;7(10):e48037. Epub 2012/11/03. doi:  
448 10.1371/journal.pone.0048037. PubMed PMID: 23118923; PubMed Central PMCID:  
449 PMC9540395.
- 450 21. Lokugamage KG, Hage A, de Vries M, Valero-Jimenez AM, Schindewolf C, Dittmann M, et  
451 al. Type I Interferon Susceptibility Distinguishes SARS-CoV-2 from SARS-CoV. *Journal of virology*.  
452 2020;94(23). Epub 2020/09/18. doi: 10.1128/JVI.01410-20. PubMed PMID: 32938761; PubMed  
453 Central PMCID: PMC7654262.
- 454 22. Russell CD, Unger SA, Walton M, Schwarze J. The Human Immune Response to  
455 Respiratory Syncytial Virus Infection. *Clin Microbiol Rev*. 2017;30(2):481-502. Epub 2017/02/10.  
456 doi: 10.1128/CMR.00090-16. PubMed PMID: 28179378; PubMed Central PMCID:  
457 PMC5355638.
- 458 23. Dee K, Schultz V, Haney J, Bissett LA, Magill C, Murcia PR. Influenza A and Respiratory  
459 Syncytial Virus Trigger a Cellular Response That Blocks Severe Acute Respiratory Syndrome  
460 Virus 2 Infection in the Respiratory Tract. *The Journal of Infectious Diseases*. 2022. doi:  
461 10.1093/infdis/jiac494.
- 462 24. Johnson TR, Mertz SE, Gitiban N, Hammond S, Legallo R, Durbin RK, et al. Role for innate  
463 IFNs in determining respiratory syncytial virus immunopathology. *Journal of immunology*.  
464 2005;174(11):7234-41. Epub 2005/05/21. doi: 10.4049/jimmunol.174.11.7234. PubMed PMID:  
465 15905569.
- 466 25. Cao X. ISG15 secretion exacerbates inflammation in SARS-CoV-2 infection. *Nat Immunol*.  
467 2021;22(11):1360-2. doi: 10.1038/s41590-021-01056-3.
- 468 26. Agha R, Avner JR. Delayed Seasonal RSV Surge Observed During the COVID-19  
469 Pandemic. *Pediatrics*. 2021;148(3). doi: 10.1542/peds.2021-052089.
- 470 27. Billard M-N, van de Ven PM, Baraldi B, Kragten-Tabatabaie L, Bont LJ, Wildenbeest JG.  
471 International changes in respiratory syncytial virus (RSV) epidemiology during the COVID-19  
472 pandemic: Association with school closures. *Influenza and Other Respiratory Viruses*.  
473 2022;16(5):926-36. doi: <https://doi.org/10.1111/irv.12998>.
- 474 28. Bardsley M, Morbey RA, Hughes HE, Beck CR, Watson CH, Zhao H, et al. Epidemiology of  
475 respiratory syncytial virus in children younger than 5 years in England during the COVID-19  
476 pandemic, measured by laboratory, clinical, and syndromic surveillance: a retrospective

477 observational study. *Lancet Infect Dis.* 2023;23(1):56-66. Epub 2022/09/06. doi:  
478 10.1016/S1473-3099(22)00525-4. PubMed PMID: 36063828; PubMed Central PMCID:  
479 PMCPMC9762748.

480 29. Kampmann B, Madhi SA, Munjal I, Simões EAF, Pahud BA, Llapur C, et al. Bivalent  
481 Prefusion F Vaccine in Pregnancy to Prevent RSV Illness in Infants. *New England Journal of*  
482 *Medicine.* 2023;388(16):1451-64. doi: 10.1056/NEJMoa2216480. PubMed PMID: 37018474.

483 30. Muruato A, Vu MN, Johnson BA, Davis-Gardner ME, Vanderheiden A, Lokugamage K, et  
484 al. Mouse-adapted SARS-CoV-2 protects animals from lethal SARS-CoV challenge. *PLoS Biol.*  
485 2021;19(11):e3001284. Epub 2021/11/05. doi: 10.1371/journal.pbio.3001284. PubMed PMID:  
486 34735434; PubMed Central PMCID: PMCPMC8594810 following competing interests: XX, P-YS,  
487 and VDM have filed a patent on the reverse genetic system and reporter SARS-CoV-2. Other  
488 authors declare no competing interests.

489 31. Qu Y, Mello AHd, Morris DR, Jones-Hall YL, Ivanciuc T, Sattler RA, et al. SARS-CoV-2  
490 Inhibits NRF2-Mediated Antioxidant Responses in Airway Epithelial Cells and in the Lung of a  
491 Murine Model of Infection. *Microbiology Spectrum.* 0(0):e00378-23. doi:  
492 doi:10.1128/spectrum.00378-23.

493 32. Morris D, Ansar M, Speshock J, Ivanciuc T, Qu Y, Casola A, et al. Antiviral and  
494 Immunomodulatory Activity of Silver Nanoparticles in Experimental RSV Infection. *Viruses.*  
495 2019;11(8). Epub 2019/08/11. doi: 10.3390/v11080732. PubMed PMID: 31398832; PubMed  
496 Central PMCID: PMCPMC6723559.

497 33. Morris DR, Ansar M, Ivanciuc T, Qu Y, Casola A, Garofalo RP. Selective Blockade of TNFR1  
498 Improves Clinical Disease and Bronchoconstriction in Experimental RSV Infection. *Viruses.*  
499 2020;12(10). Epub 2020/10/22. doi: 10.3390/v12101176. PubMed PMID: 33080861; PubMed  
500 Central PMCID: PMCPMC7588931.

501
